# Supplementary material
Source: publisher figshare collection journal article supplement (https://frontiersin.figshare.com/ndownloader/files/24604889)
Supplement: Supplementary file 1 [file 24604889]

Supplementary Material


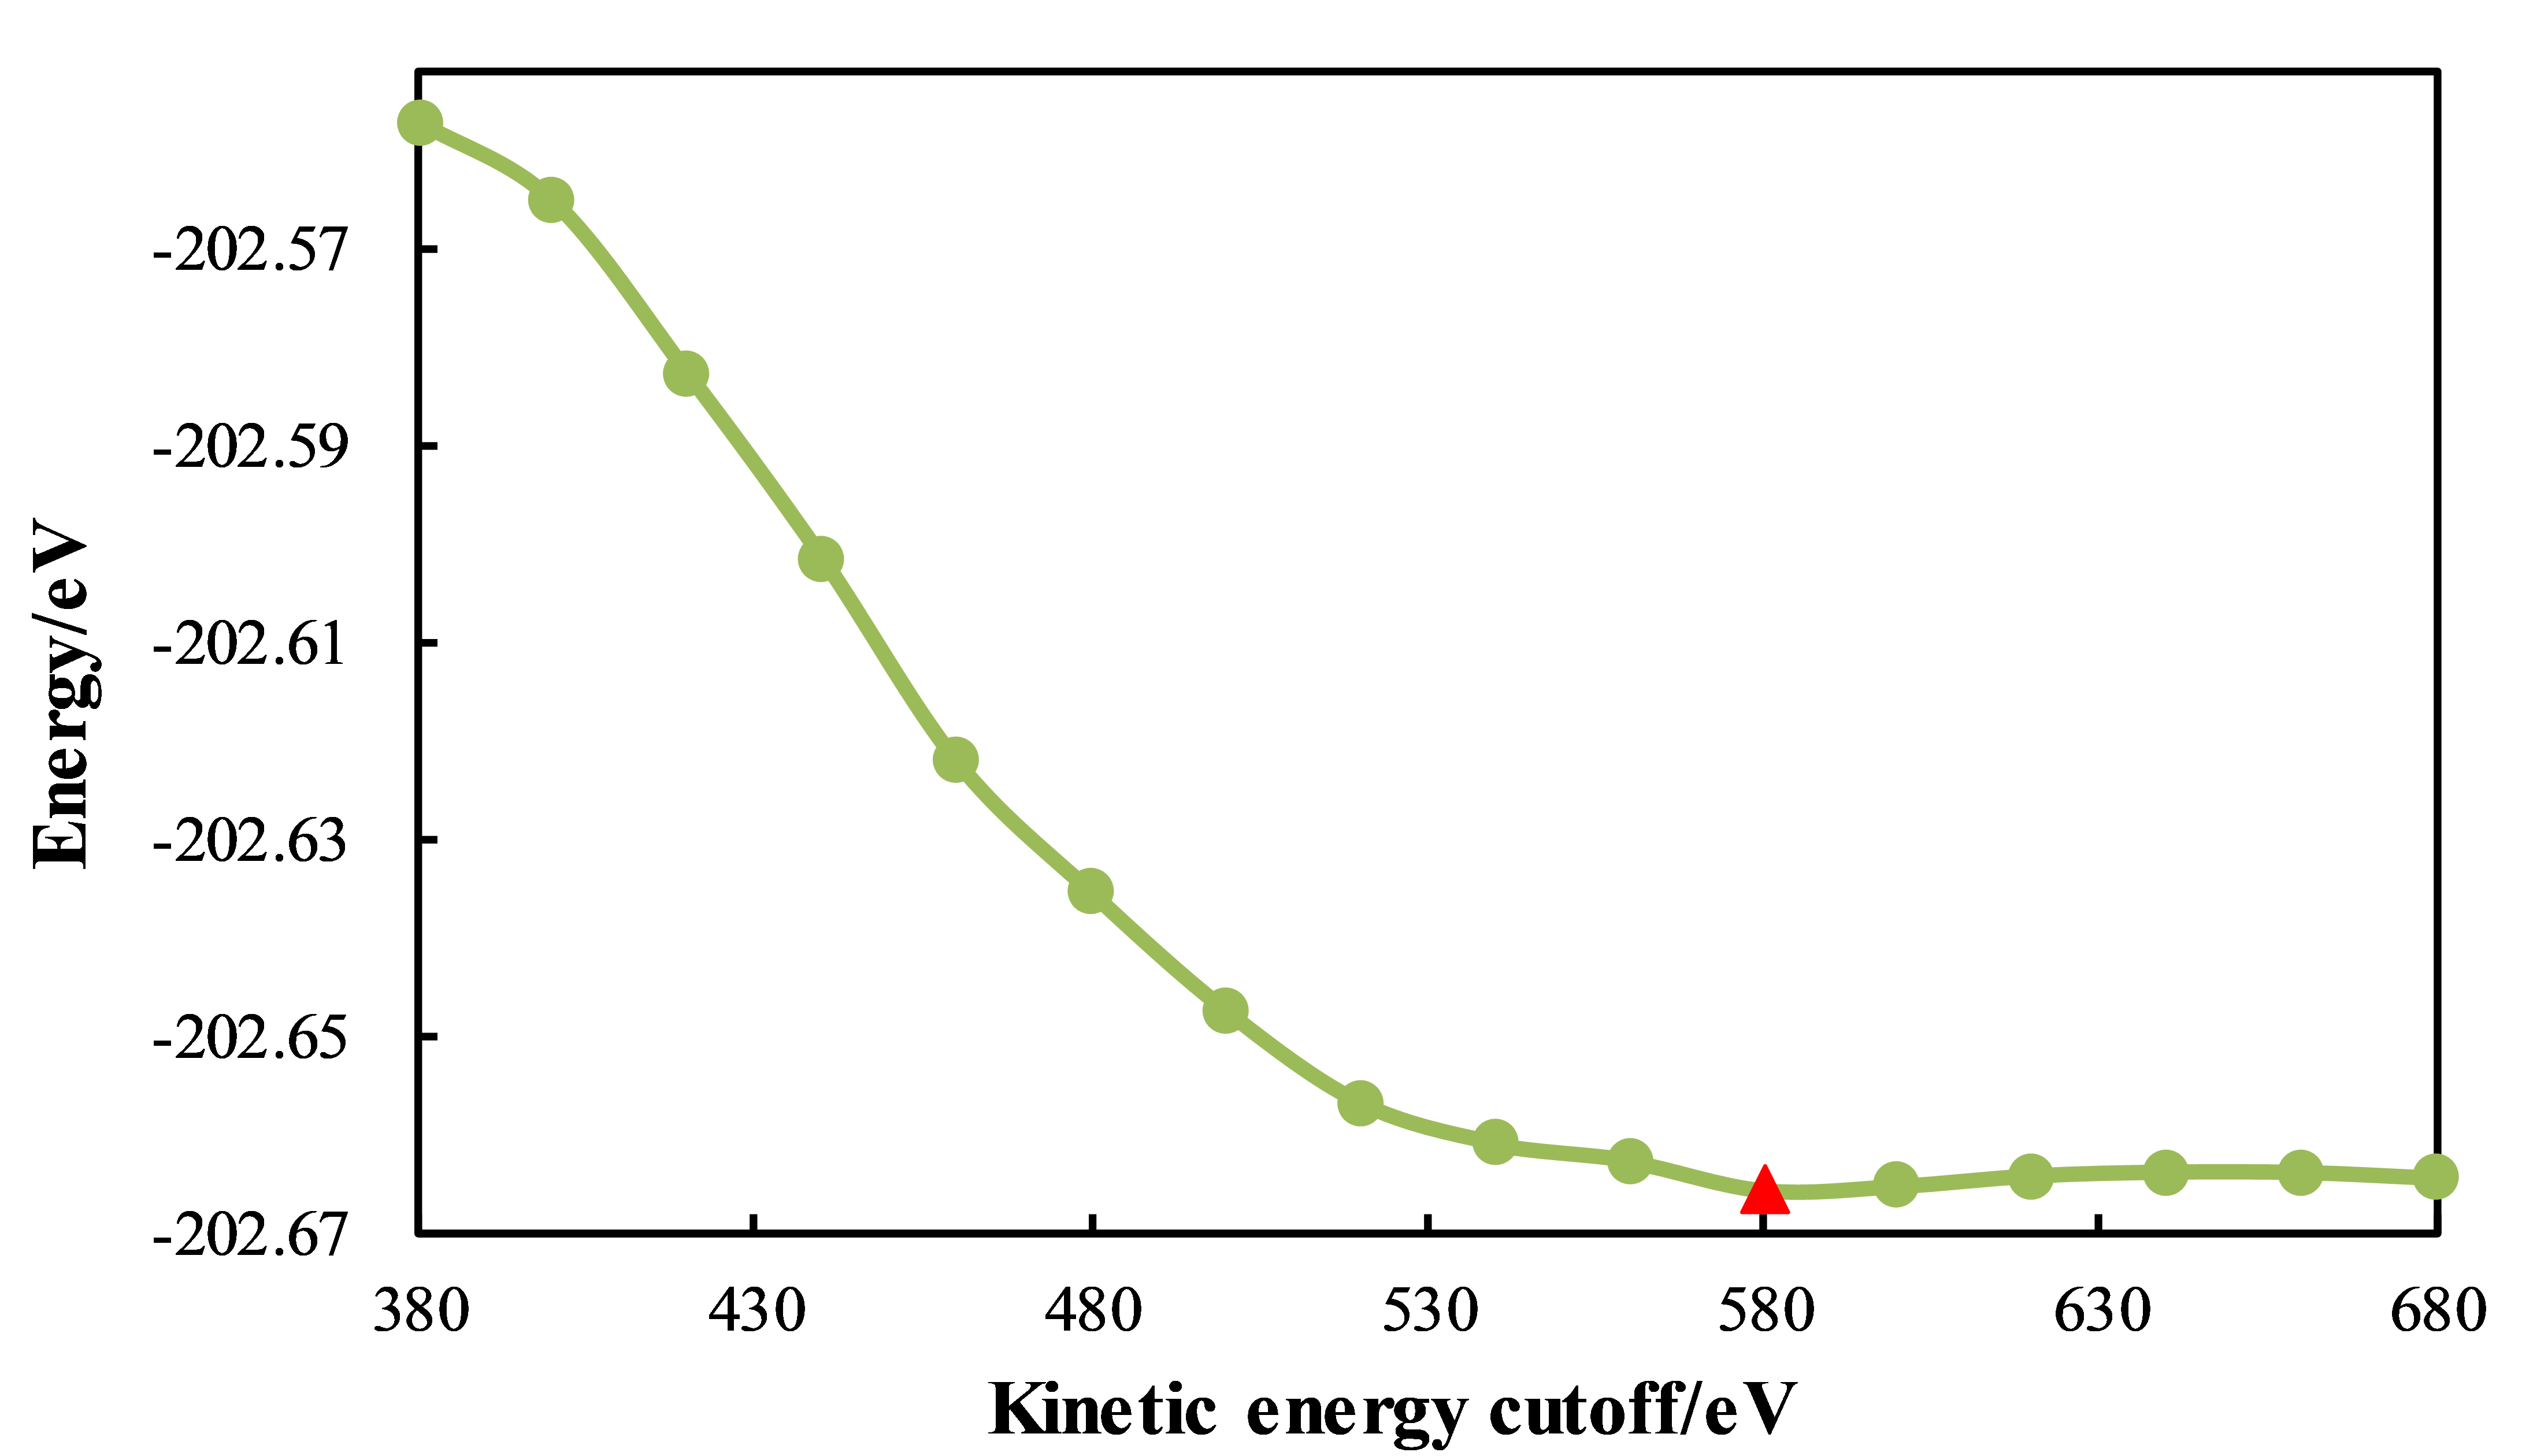


**S1.** Kinetic energy cutoff tests. With the increase of kinetic energy cutoff, the calculated energy is gradually converged and a cutoff of 580 eV is chosen for the study.

**Settings for geometry optimization (VASP):**

ISPIN = 2

ISYM = 0

ALGO = Fast

LREAL = Auto

PREC = accurate

ENCUT = 580 eV

EDIFF = 1E-05

NELM = 100

ISMEAR = -5

IBRION = 2

ISIF = 3

POTIM = 0.2

EDIFFG = -0.005

NSW = 300

**Settings for electronic structure calculations (CASTEP):**

xc_functional : PBE

spin_polarized : true

opt_strategy : Default

cut_off_energy : 610

grid_scale : 2.0

fine_grid_scale : 3.0

finite_basis_corr : 0

elec_energy_tol : 1e-06

max_scf_cycles : 400

fix_occupancy : true

metals_method : dm

mixing_scheme : Pulay

mix_charge_amp : 0.5

mix_spin_amp : 2.0

mix_charge_gmax : 1.5

mix_spin_gmax : 1.5

mix_history_length : 20

nextra_bands : 0

num_dump_cycles : 0

calculate_ELF : true

calculate_stress : false

popn_calculate : true

calculate_hirshfeld : true

calculate_densdiff : true

popn_bond_cutoff : 3.0

pdos_calculate_weights : true

write_orbitals : true

**S2.** Calculated average bond orders (BO) of Si-O bonds and Ca-O bonds, total bond order (TBO), volume, total bond order density (TBOD), and normalized TBOD of γ-Ca2SiO4 with different doping schemes.

| Group | Dopants | Doping site | BO (Si-O) | BO (Ca-O) | TBO | Volume (Å3) | TBOD | Normalized  TBOD |
| --- | --- | --- | --- | --- | --- | --- | --- | --- |
| IIA | Mg | Ca | 0.546 | 0.120 | 58.410 | 1572.520 | 0.037 | 1.023 |
| Pure | Ca | 0.543 | 0.119 | 57.600 | 1586.620 | 0.036 | 1.000 |
| Sr | Ca | 0.544 | 0.119 | 57.730 | 1595.670 | 0.036 | 0.997 |
| Ba | Ca | 0.543 | 0.121 | 57.530 | 1606.100 | 0.036 | 0.987 |
| IIIA | Al | Ca | 0.540 | 0.117 | 57.720 | 1564.870 | 0.037 | 1.008 |
| Si | 0.543 | 0.120 | 1590.820 |
| average | 0.542 | 0.118 |  |
| VA | P | Si | 0.540 | 0.117 | 57.110 | 1592.080 | 0.036 | 0.988 |
| VIIA | F | O | 0.544 | 0.118 | 56.830 | 1596.360 | 0.036 | 0.981 |
| Cl | O | 0.544 | 0.118 | 56.900 | 1609.250 | 0.035 | 0.974 |
| Br | O | 0.544 | 0.118 | 56.560 | 1615.040 | 0.035 | 0.965 |
| VIII | Fe | Ca | 0.545 | 0.119 | 57.920 | 1566.650 | 0.037 | 1.011 |
| Si | 0.544 | 0.119 | 1589.700 |
| average | 0.544 | 0.119 |  |
| IIB | Zn | Ca | 0.546 | 0.120 | 58.690 | 1573.900 | 0.037 | 1.027 |
